# Supplementary material
Source: HighWire-hosted journal article supplement (https://bmjopen.bmj.com/content/7/8/e014402)
Supplement: inline-supplementary-material-1 [file inline-supplementary-material-1.pdf]

## Robustness check

In this study, we used bivariate logistic regressions and multiple linear regressions to check the Robustness.

### 1. Influencing factors of NCDs

The f bivariate logistic regressions was to analyze the effects of individual annual income, education, occupation, medical insurance, smoking, self-reported health and interaction of these factors on NCDs (Table 1).

**Table 1** The effects of individual annual income, education, occupation, medical insurance, smoking and self-reported health and interaction on NCDs by bivariate logistic regression

| Independent Variable                           | B      | SE    | P      |
|------------------------------------------------|--------|-------|--------|
| <b>Model 1</b>                                 |        |       |        |
| Self-reported health                           | -0.070 | 0.001 | <0.001 |
| Smoking                                        | 0.271  | 0.062 | <0.001 |
| Education                                      | -0.449 | 0.018 | <0.001 |
| Individual annual income                       | 0.207  | 0.009 | <0.001 |
| Occupation                                     | 0.085  | 0.014 | <0.001 |
| Medical Insurance                              | 0.354  | 0.026 | <0.001 |
| <b>Model 2</b>                                 |        |       |        |
| self-reported health                           | -0.070 | 0.001 | <0.001 |
| Smoking                                        | -0.198 | 0.165 | >0.05  |
| Education                                      | -0.458 | 0.018 | <0.001 |
| Individual annual income                       | 0.207  | 0.009 | <0.001 |
| Occupation                                     | 0.085  | 0.014 | <0.001 |
| Medical Insurance                              | 0.355  | 0.026 | <0.001 |
| Education*smoking                              | 0.278  | 0.090 | <0.01  |
| <b>Model 3</b>                                 |        |       |        |
| self-reported health                           | -0.058 | 0.002 | <0.001 |
| Smoking                                        | 0.273  | 0.062 | <0.001 |
| Education                                      | -0.448 | 0.018 | <0.001 |
| Individual annual income                       | 0.491  | 0.042 | <0.001 |
| Occupation                                     | 0.084  | 0.014 | <0.001 |
| Medical Insurance                              | 0.352  | 0.026 | <0.001 |
| Individual annual income* self-reported health | -0.004 | 0.001 | <0.001 |

Note: The dependent variable was NCDs with 0=did not suffer NCDs and 1=suffered NCDs.

Continued:

| Independent Variable                                    | B      | SE    | P      |
|---------------------------------------------------------|--------|-------|--------|
| <b>Model 4</b>                                          |        |       |        |
| Self-reported health                                    | -0.081 | 0.003 | <0.001 |
| Smoking                                                 | 0.267  | 0.062 | <0.001 |
| Education                                               | -0.450 | 0.018 | <0.001 |
| Individual annual income                                | 0.207  | 0.009 | <0.001 |
| Occupation                                              | 0.085  | 0.014 | <0.001 |
| Medical Insurance                                       | -0.025 | 0.117 | >0.05  |
| Medical Insurance * Self-reported health                | 0.005  | 0.002 | 0.001  |
| <b>Model 5</b>                                          |        |       |        |
| Self-reported health                                    | -0.069 | 0.001 | <0.001 |
| Smoking                                                 | 0.267  | 0.062 | <0.001 |
| Education                                               | -0.587 | 0.025 | <0.001 |
| Individual annual income                                | 0.161  | 0.011 | <0.001 |
| Occupation                                              | -0.044 | 0.022 | >0.05  |
| Medical Insurance                                       | 0.331  | 0.026 | <0.001 |
| Occupation * Education* Individual annual income        | 0.013  | 0.002 | <0.001 |
| <b>Model 6</b>                                          |        |       |        |
| Self-reported health                                    | -0.070 | 0.001 | <0.001 |
| Smoking                                                 | 0.161  | 0.081 | <0.05  |
| Education                                               | -0.451 | 0.018 | <0.001 |
| Individual annual income                                | 0.206  | 0.009 | <0.001 |
| Occupation                                              | 0.083  | 0.014 | <0.001 |
| Medical Insurance                                       | 0.354  | 0.026 | <0.001 |
| Education*Occupation * Individual annual income*smoking | 0.008  | 0.004 | <0.05  |

Note: The dependent variable was NCDs with 0=did not suffer NCDs and 1=suffered NCDs.

As table 1 showed that all of factors were relation with NCDs, and education and self-reported health were protective factors for NCDs, others were risk. Furthermore, five interactions were examined significantly. The results were consistent with SEM.

## 2. Influencing factors of self-reported health

The multiple linear regressions was to analyze the effects of individual annual income, education, occupation, medical insurance, smoking on self-reported health (Table 2).

**Table 2** The effects of individual annual income, education, occupation, medical insurance, smoking on self-reported health by multiple linear regression

| Independent Variable     | B      | $\beta$ | P     |
|--------------------------|--------|---------|-------|
| Individual annual income | 0.280  | 0.028   | 0.000 |
| Education                | 5.161  | 0.277   | 0.000 |
| Occupation               | -0.400 | -0.028  | 0.000 |
| Medical insurance        | -2.786 | -0.105  | 0.000 |
| Smoking                  | -4.575 | -0.051  | 0.000 |

Note: “B” was unstandardized regression coefficient; “ $\beta$ ” was standardized regression coefficient.

As table 2 showed that effects of individual annual income, education, occupation, medical insurance, smoking were significant. Individual annual income and education had positive correlation to self-reported health, and others had negative correlation with self-reported health. The results were consistent with SEM, too.
